# Supplementary material
Source: publisher figshare collection journal article supplement (https://springernature.figshare.com/ndownloader/files/37572256)
Supplement: Supplementary file [file 37572256]

**Additional file 1**

Additional file 1. Characteristics of studies

p.2

Full title of instruments in Additional file 1

p.21

## Additional file 1. Characteristics of studies

| Year published | Study                                                                                                                      | Journal                            | Area of public health | Type of research                                       | Discipline public health, human rights, or both | International instruments used                                                            | Principles of the right to health                                                                                                                                                                                                                                                                                                              |
|----------------|----------------------------------------------------------------------------------------------------------------------------|------------------------------------|-----------------------|--------------------------------------------------------|-------------------------------------------------|-------------------------------------------------------------------------------------------|------------------------------------------------------------------------------------------------------------------------------------------------------------------------------------------------------------------------------------------------------------------------------------------------------------------------------------------------|
| 2006           | Evans DP, Price ME, Gulrajani TL, Hinman AR.<br>Making the grade: a first attempt at a health and human rights report card | Health and Human Rights Journal    | General               | Uses current public health indicators                  | Public health                                   | UDHR<br>UN Charter<br>ICCPR<br>ICESCR                                                     | None                                                                                                                                                                                                                                                                                                                                           |
| 2006           | Gruskin S. Rights-based approaches to health: something for everyone                                                       | Health and Human Rights Journal    | General               | Defines or discusses principles of the right to health | Human rights                                    | None                                                                                      | Non exhaustive list:<br><ul style="list-style-type: none"> <li>• Participation</li> <li>• Non-discrimination</li> <li>• Legal and policy contexts</li> <li>• Transparency</li> <li>• Accountability</li> </ul>                                                                                                                                 |
| 2006           | Hogerzeil HV. Essential medicines and human rights: what can they learn from each other?                                   | Bulletin of the WHO                | Access to medicines   | Defines or discusses principles of the right to health | Human rights                                    | WHO Constitution<br>UDHR<br>Alma-Ata Declaration<br>ICCPR<br>ICESCR<br>General Comment 14 | <ul style="list-style-type: none"> <li>• Progressive realisation</li> <li>• Immediate obligations</li> <li>• Participation</li> <li>• Accountability</li> <li>• Transparency</li> <li>• Equality and non-discrimination</li> <li>• Redress</li> </ul>                                                                                          |
| 2007           | Brennan F. Palliative care as an international human right                                                                 | Journal of Pain Symptom Management | Palliative care       | Defines or discusses principles of the right to health | Public health                                   | ICESCR                                                                                    | <ul style="list-style-type: none"> <li>• Access to health services and drugs on a non-discriminatory basis;</li> <li>• Provision of essential drugs</li> <li>• National public health strategy</li> <li>• Progressive realisation</li> <li>• Maximum available resources</li> <li>• Duty-bearers (states)</li> <li>• Enforceability</li> </ul> |

| Year published | Study                                                                                                                               | Journal | Area of public health | Type of research                                       | Discipline public health, human rights, or both | International instruments used                  | Principles of the right to health                                                                                                                                                                                                                                                       |
|----------------|-------------------------------------------------------------------------------------------------------------------------------------|---------|-----------------------|--------------------------------------------------------|-------------------------------------------------|-------------------------------------------------|-----------------------------------------------------------------------------------------------------------------------------------------------------------------------------------------------------------------------------------------------------------------------------------------|
| 2007           | Gruskin S, Ferguson L, Bogecho DO. Beyond the numbers: using rights-based perspectives to enhance antiretroviral treatment scale-up | AIDS    | HIV                   | Defines or discusses principles of the right to health | Public health                                   | None                                            | <ul style="list-style-type: none"> <li>• Accountability</li> <li>• Transparency of pricing of treatment</li> <li>• Participation and advocacy</li> <li>• Progressive realisation</li> <li>• Monitoring with disaggregated data</li> <li>• Non-discrimination</li> <li>• AAAQ</li> </ul> |
| 2007           | Hunt P. Right to the highest attainable standard of health                                                                          | Lancet  | General               | Defines or discusses principles of the right to health | Both                                            | WHO Constitution<br>ICESCR<br>General Comment 1 | <ul style="list-style-type: none"> <li>• Underlying determinants of health</li> <li>• Non-discrimination</li> <li>• Participation</li> <li>• Accountability</li> <li>• Progressive realisation</li> </ul>                                                                               |

| Year published | Study                                                                                                      | Journal | Area of public health | Type of research                             | Discipline public health, human rights, or both | International instruments used                                                                                                                                                                                                                           | Principles of the right to health                                                                                                                                                                                                                                                                                                                                                                                        |
|----------------|------------------------------------------------------------------------------------------------------------|---------|-----------------------|----------------------------------------------|-------------------------------------------------|----------------------------------------------------------------------------------------------------------------------------------------------------------------------------------------------------------------------------------------------------------|--------------------------------------------------------------------------------------------------------------------------------------------------------------------------------------------------------------------------------------------------------------------------------------------------------------------------------------------------------------------------------------------------------------------------|
| 2008           | Backman G, Hunt P, Khosla R, et al. Health systems and the right to health: an assessment of 194 countries | Lancet  | General               | Constructs new indicators or a new framework | Both                                            | ICESCR<br>CERD<br>WHO<br>Constitution<br>Alma-Ata<br>Declaration<br>Ottawa Charter<br>Bangkok Charter<br>General<br>Comment 14<br>IHR<br>FCTC<br>General<br>Comment 3<br>General<br>Comment 4<br>CRC<br>General<br>Recommendation<br>24<br>CEDAW<br>UDHR | <ul style="list-style-type: none"> <li>• Legal recognition</li> <li>• Participation</li> <li>• Transparency</li> <li>• Equity, equality, and non-discrimination</li> <li>• Respect for cultural differences</li> <li>• Planning</li> <li>• Referral systems</li> <li>• Coordination</li> <li>• International cooperation</li> <li>• Legal obligation</li> <li>• Monitoring and accountability</li> <li>• AAAQ</li> </ul> |

| Year published | Study                                                                                                                                                                        | Journal              | Area of public health     | Type of research                          | Discipline public health, human rights, or both | International instruments used                                        | Principles of the right to health                                                                                                                                                                                                                                                                                                                                                                                                                                                                                                                                                                                                                                                                                                                                                                                                                                                                                                                                                                              |
|----------------|------------------------------------------------------------------------------------------------------------------------------------------------------------------------------|----------------------|---------------------------|-------------------------------------------|-------------------------------------------------|-----------------------------------------------------------------------|----------------------------------------------------------------------------------------------------------------------------------------------------------------------------------------------------------------------------------------------------------------------------------------------------------------------------------------------------------------------------------------------------------------------------------------------------------------------------------------------------------------------------------------------------------------------------------------------------------------------------------------------------------------------------------------------------------------------------------------------------------------------------------------------------------------------------------------------------------------------------------------------------------------------------------------------------------------------------------------------------------------|
| 2008           | D'Ambruoso L, Byass P, Nurul Qomariyah S. Can the right to health inform public health planning in developing countries? A case study for maternal healthcare from Indonesia | Global Health Action | Maternal and child health | Reviews cases, programmes, policies, laws | Public health                                   | UDHR<br>General Comment 14<br>Declaration on the right to development | <ul style="list-style-type: none"> <li>● Availability: functioning facilities, goods, services, and programmes must be available in sufficient quantity</li> <li>● Accessibility (non-discrimination): facilities, goods and services must be accessible to all, especially vulnerable and marginalised groups</li> <li>● Accessibility (physical): facilities, goods and services must be within safe reach for all population (incl. marginalised groups)</li> <li>● Accessibility (economic): facilities, goods and services must be affordable for all. Payment based on equity, whether public or private</li> <li>● Accessibility (information): right to seek, receive and impart information on health issues</li> <li>● Acceptability: facilities, goods and services must be respectful of medical ethics and culturally appropriate, sensitive to gender and respect confidentiality</li> <li>● Quality: facilities, goods and services must be scientifically and medically appropriate</li> </ul> |

| Year published | Study                                                                                                                | Journal                         | Area of public health | Type of research                                       | Discipline public health, human rights, or both | International instruments used                                                                       | Principles of the right to health                                                                                                                                                                                                                                                                                                                                                                                                                                                                                                                                                                                                                                                                                           |
|----------------|----------------------------------------------------------------------------------------------------------------------|---------------------------------|-----------------------|--------------------------------------------------------|-------------------------------------------------|------------------------------------------------------------------------------------------------------|-----------------------------------------------------------------------------------------------------------------------------------------------------------------------------------------------------------------------------------------------------------------------------------------------------------------------------------------------------------------------------------------------------------------------------------------------------------------------------------------------------------------------------------------------------------------------------------------------------------------------------------------------------------------------------------------------------------------------------|
| 2008           | Hunt P, Backman G. Health systems and the right to the highest attainable standard of health                         | Health and Human Rights Journal | General               | Defines or discusses principles of the right to health | Both                                            | WHO Constitution<br>Alma-Ata Declaration<br>Ottawa Charter<br>General Comment 14                     | Principles must be applied to each of the 6 WHO building blocks of a health system. <ul style="list-style-type: none"> <li>• People-centred health systems</li> <li>• Transparency, participation, equality and non-discrimination</li> <li>• Respect for cultural differences</li> <li>• Underlying determinants of health</li> <li>• Progressive realisation</li> <li>• Core obligations (such as planning)</li> <li>• Quality</li> <li>• Continuum of prevention and care with effective referrals</li> <li>• Vertical or integrated approach</li> <li>• Coordination</li> <li>• International cooperation</li> <li>• Striking balances</li> <li>• Monitoring and accountability</li> <li>• Legal obligations</li> </ul> |
| 2008           | London L. What is a human-rights based approach to health and does it matter?                                        | Health and Human Rights Journal | General               | Defines or discusses principles of the right to health | Human rights                                    | None                                                                                                 | <ul style="list-style-type: none"> <li>• Participation</li> <li>• Information</li> <li>• Redress</li> <li>• Accountability: both states and private actors</li> </ul>                                                                                                                                                                                                                                                                                                                                                                                                                                                                                                                                                       |
| 2009           | Gruskin S, Ferguson L. Using indicators to determine the contribution of human rights to public health efforts       | Bulletin of the WHO             | General               | Defines or discusses principles of the right to health | Public health                                   | None                                                                                                 | <ul style="list-style-type: none"> <li>• Participation</li> <li>• Non-discrimination</li> <li>• AAAQ</li> <li>• Transparency</li> <li>• Accountability</li> </ul>                                                                                                                                                                                                                                                                                                                                                                                                                                                                                                                                                           |
| 2009           | Palmer A, Tomkinson J, Phung C, et al. Does ratification of human-rights treaties have effects on population health? | Lancet                          | General               | Constructs new indicators or a new framework           | Public health                                   | UDHR<br>ICESCR<br>ICCPR<br>CRC<br>General Comment 14<br>Alma-Ata Declaration<br>CEDAW<br>CAT<br>CERD | <ul style="list-style-type: none"> <li>• Progressive realisation</li> <li>• Resources availability</li> <li>• Core minimum obligations</li> </ul>                                                                                                                                                                                                                                                                                                                                                                                                                                                                                                                                                                           |

| Year published | Study                                                                                                                                       | Journal                         | Area of public health          | Type of research                                       | Discipline public health, human rights, or both | International instruments used                                                   | Principles of the right to health                                                                                                                                                                                                                                                                                                                                                                                                                                                                                                           |
|----------------|---------------------------------------------------------------------------------------------------------------------------------------------|---------------------------------|--------------------------------|--------------------------------------------------------|-------------------------------------------------|----------------------------------------------------------------------------------|---------------------------------------------------------------------------------------------------------------------------------------------------------------------------------------------------------------------------------------------------------------------------------------------------------------------------------------------------------------------------------------------------------------------------------------------------------------------------------------------------------------------------------------------|
| 2010           | Gruskin S, Bogecho D, Ferguson L. Rights-based approaches to health policies and programs: articulations, ambiguities, and assessment       | Journal of Public Health Policy | General                        | Defines or discusses principles of the right to health | Both                                            | CRC                                                                              | <ul style="list-style-type: none"> <li>• Duty-bearer: state's responsibility to respect, protect and fulfil</li> <li>• Rights-holder</li> <li>• Non-discrimination</li> <li>• Participation</li> <li>• Transparency</li> <li>• Accountability: implies access to remedy</li> <li>• Availability</li> <li>• Accessibility (non-discrimination)</li> <li>• Accessibility (physical)</li> <li>• Accessibility (financial)</li> <li>• Accessibility (information)</li> <li>• Acceptability: incl. confidentiality</li> <li>• Quality</li> </ul> |
| 2010           | Rasanathan K, Norenhag J, Valentine N. Realizing human rights-based approaches for action on the social determinants of health              | Health and Human Rights Journal | General                        | Defines or discusses principles of the right to health | Human rights                                    | WHO Constitution<br>UDHR<br>ICESCR<br>Alma-Ata Declaration<br>General Comment 14 | <ul style="list-style-type: none"> <li>• Participation</li> <li>• Equality</li> <li>• Non-discrimination</li> <li>• Accountability</li> <li>• Rights holders and duty bearers</li> <li>• Progressive realisation</li> <li>• Social determinants of health</li> </ul>                                                                                                                                                                                                                                                                        |
| 2010           | Cottingham J, Kismodi E, Hilber AM, et al. Using human rights for sexual and reproductive health: improving legal and regulatory frameworks | Bulletin of the WHO             | Sexual and reproductive health | Constructs new indicators or a new framework           | Public health                                   | None                                                                             | None                                                                                                                                                                                                                                                                                                                                                                                                                                                                                                                                        |

| Year published | Study                                                                                                                                                | Journal                            | Area of public health                             | Type of research                                       | Discipline public health, human rights, or both | International instruments used | Principles of the right to health                                                                                                                                                                                                                                         |
|----------------|------------------------------------------------------------------------------------------------------------------------------------------------------|------------------------------------|---------------------------------------------------|--------------------------------------------------------|-------------------------------------------------|--------------------------------|---------------------------------------------------------------------------------------------------------------------------------------------------------------------------------------------------------------------------------------------------------------------------|
| 2010           | Perehudoff SK, Laing RO, Hogerzeil HV. Access to essential medicines in national constitutions                                                       | Bulletin of the WHO                | Access to medicines and constitutional provisions | Defines or discusses principles of the right to health | Public health                                   | ICESCR General Comment 14      | <ul style="list-style-type: none"> <li>● Accessibility</li> <li>● Availability</li> <li>● Appropriateness</li> <li>● Quality</li> </ul> of goods and services, incl. essential medicines as defined by the WHO Action Programme on Essential Drugs                        |
| 2010           | Chowdhury OH, Osmani SR. Towards achieving the right to health: the case of Bangladesh                                                               | The Bangladesh Development Studies | General                                           | Reviews cases, programmes, policies, laws              | Public health                                   | Alma-Ata Declaration<br>ICESCR | <ul style="list-style-type: none"> <li>● Equity and non-discrimination</li> <li>● Participation</li> <li>● Accountability</li> <li>● Progressive realisation</li> <li>● AAAQ</li> </ul>                                                                                   |
| 2011           | Mpinga EK, Chastonay P. Satisfaction of patients: a right to health indicator?                                                                       | Health Policy                      | General                                           | Defines or discusses principles of the right to health | Public health                                   | General Comment 14<br>ICESCR   | <ul style="list-style-type: none"> <li>● Availability</li> <li>● Accessibility (non-discrimination)</li> <li>● Accessibility (physical)</li> <li>● Accessibility (economic)</li> <li>● Accessibility (information)</li> <li>● Acceptability</li> <li>● Quality</li> </ul> |
| 2011           | Amin M, MacLachlan M, Mannan H, et al. EquiFrame: a framework for analysis of the inclusion of human rights and vulnerable groups in health policies | Health and Human Rights Journal    | General                                           | Constructs new indicators or a new framework           | Public health                                   | Alma-Ata Declaration           | None                                                                                                                                                                                                                                                                      |



| Year published | Study                                                                                                                                   | Journal                                                 | Area of public health | Type of research                                       | Discipline public health, human rights, or both | International instruments used       | Principles of the right to health                                                                                                                                                                                          |
|----------------|-----------------------------------------------------------------------------------------------------------------------------------------|---------------------------------------------------------|-----------------------|--------------------------------------------------------|-------------------------------------------------|--------------------------------------|----------------------------------------------------------------------------------------------------------------------------------------------------------------------------------------------------------------------------|
| 2012           | Williams C, Brian G. Using health rights to improve programme design: a Papua New Guinea case study                                     | International Journal of Health Planning and Management | Eye health            | Constructs new indicators or a new framework           | Both                                            | UDHR<br>ICESCR<br>General Comment 14 | <ul style="list-style-type: none"> <li>• AAAQ</li> <li>• Progressive realisation</li> <li>• Core obligations</li> </ul>                                                                                                    |
| 2012           | Gruskin S, Ahmed S, Bogecho D, et al. Human rights in health systems frameworks: what is there, what is missing and why does it matter? | Global Public Health                                    | General               | Defines or discusses principles of the right to health | Public health                                   | ICESCR<br>General Comment 14         | <ul style="list-style-type: none"> <li>• AAAQ</li> <li>• Equality and non-discrimination</li> <li>• Participation</li> <li>• Accountability</li> <li>• Legal and policy contexts</li> </ul>                                |
| 2012           | Maru D, Farmer P. Human rights and health systems development: confronting the politics of exclusion and the economics of inequality    | Health and Human Rights Journal                         | General               | Reviews cases, programmes, policies, laws              | Public health                                   | UDHR                                 | <ul style="list-style-type: none"> <li>• Participation, incl. marginalised groups</li> <li>• Accountability of the state and its agents</li> <li>• National public health strategy based on scientific evidence</li> </ul> |

| Year published | Study                                                                                                                                    | Journal              | Area of public health | Type of research                             | Discipline public health, human rights, or both | International instruments used | Principles of the right to health                                                                                                                                                                                                                                                                                                                                                                                                                                                                                                                                                                                                                                                                                   |
|----------------|------------------------------------------------------------------------------------------------------------------------------------------|----------------------|-----------------------|----------------------------------------------|-------------------------------------------------|--------------------------------|---------------------------------------------------------------------------------------------------------------------------------------------------------------------------------------------------------------------------------------------------------------------------------------------------------------------------------------------------------------------------------------------------------------------------------------------------------------------------------------------------------------------------------------------------------------------------------------------------------------------------------------------------------------------------------------------------------------------|
| 2013           | Eide AH, Amin M, MacLachlan M, Mannan H, Schneider M. Addressing equitable health of vulnerable groups in international health documents | Alter                | General               | Constructs new indicators or a new framework | Public health                                   | None                           | <ul style="list-style-type: none"> <li>• Non-discrimination</li> <li>• Individualised services</li> <li>• Entitlement</li> <li>• Capability-based services</li> <li>• Participation</li> <li>• Co-ordination of services</li> <li>• Protection from harm</li> <li>• Liberty</li> <li>• Autonomy</li> <li>• Privacy</li> <li>• Integration</li> <li>• Contribution</li> <li>• Family resource</li> <li>• Family support</li> <li>• Cultural responsiveness</li> <li>• Accountability</li> <li>• Prevention</li> <li>• Capacity building</li> <li>• Access</li> <li>• Quality</li> <li>• Efficiency</li> </ul>                                                                                                        |
| 2013           | King EJ, Maman S, Wyckoff SC, Pierce MW, Groves AK. HIV testing for pregnant women: a rights-based analysis of national policies         | Global Public Health | HIV                   | Reviews cases, programmes, policies, laws    | Public health                                   | None                           | <ul style="list-style-type: none"> <li>• Consent: informed consent after receiving information on the risks of HIV testing</li> <li>• Confidentiality</li> <li>• Counselling</li> <li>• Obligation to respect: evidence that governments are not violating the rights of pregnant women through national HIV testing policies (in particular with regards to consent and confidentiality)</li> <li>• Obligation to protect: extent to which the policies address how to protect women from violence, stigma and other adverse consequences as a result of HIV testing and diagnosis</li> <li>• Obligation to fulfil: provision of counselling services, access to treatment and plans for implementation</li> </ul> |

| Year published | Study                                                                                                                                                      | Journal                                  | Area of public health     | Type of research                             | Discipline public health, human rights, or both | International instruments used                         | Principles of the right to health                                                                                                                                                                                                                                                                                                                                                                                                                                                                                                                                                                                                                                                                                                                                                                                       |
|----------------|------------------------------------------------------------------------------------------------------------------------------------------------------------|------------------------------------------|---------------------------|----------------------------------------------|-------------------------------------------------|--------------------------------------------------------|-------------------------------------------------------------------------------------------------------------------------------------------------------------------------------------------------------------------------------------------------------------------------------------------------------------------------------------------------------------------------------------------------------------------------------------------------------------------------------------------------------------------------------------------------------------------------------------------------------------------------------------------------------------------------------------------------------------------------------------------------------------------------------------------------------------------------|
| 2013           | Heymann J, Cassola A, Raub A, Mishra L. Constitutional rights to health, public health and medical care: the status of health protections in 191 countries | Global Public Health                     | Constitutional provisions | Constructs new indicators or a new framework | Both                                            | UDHR<br>CRC<br>CRPD<br>CERD<br>CEDAW<br>CRMW<br>ICESCR | <ul style="list-style-type: none"> <li>• Interrelatedness of human rights</li> <li>• Progressive realisation</li> <li>• Transparency</li> <li>• Accountability</li> </ul>                                                                                                                                                                                                                                                                                                                                                                                                                                                                                                                                                                                                                                               |
| 2013           | Uddin J, Momtaz S, Islam MS. State obligation towards the fulfillment of the right to health: a study in Bangladesh                                        | Mediterranean Journal of Social Sciences | General                   | Reviews cases, programmes, policies, laws    | Public health                                   | National constitution<br>UDHR<br>ICESCR                | <ul style="list-style-type: none"> <li>• Underlying determinants of health, incl. access to information</li> <li>• AAAQ, incl. access to information</li> <li>• Monitoring and accountability</li> <li>• Progressive realisation</li> <li>• Non-discrimination</li> <li>• Participation</li> </ul>                                                                                                                                                                                                                                                                                                                                                                                                                                                                                                                      |
| 2014           | Hardee K, Kumar J, Newman K, Bakamjian L, Harris S, Rodriguez M, Brown W. Voluntary, human rights-based family planning: a conceptual framework            | Studies in Family Planning               | Maternal and child health | Constructs new indicators or a new framework | Public health                                   | UDHR<br>ICESCR<br>General Comment 14                   | <ul style="list-style-type: none"> <li>• Availability</li> <li>• Accessibility</li> <li>• Acceptability</li> <li>• Quality</li> <li>• Autonomy: principle of voluntarism, i.e. right to bodily integrity and security of person and right to decide freely and responsibly the number and spacing of children</li> <li>• Information: right to sexual and reproductive health services, information, and education</li> <li>• Equality and non-discrimination: right to make decisions concerning reproduction free of discrimination, coercion and violence</li> <li>• Analysing health inequalities and laws and policies under which programmes operate</li> <li>• Right holders and duty bearers</li> <li>• Accountability</li> <li>• Empowerment</li> <li>• Non-discrimination</li> <li>• Participation</li> </ul> |

| Year published | Study                                                                                                                                                                      | Journal                                  | Area of public health                 | Type of research                                       | Discipline public health, human rights, or both | International instruments used | Principles of the right to health                                                                                                                                                                                                                                                                                                                                                                                                                                                                                                                                                                                   |
|----------------|----------------------------------------------------------------------------------------------------------------------------------------------------------------------------|------------------------------------------|---------------------------------------|--------------------------------------------------------|-------------------------------------------------|--------------------------------|---------------------------------------------------------------------------------------------------------------------------------------------------------------------------------------------------------------------------------------------------------------------------------------------------------------------------------------------------------------------------------------------------------------------------------------------------------------------------------------------------------------------------------------------------------------------------------------------------------------------|
| 2015           | Ranjbar V, Hjalmarsson A, Ascher H, Ekberg-jansson A. Chronic obstructive pulmonary disease mobile care: a participant-focussed and human rights-based evaluation          | Health Services Management Research      | Chronic obstructive pulmonary disease | Reviews cases, programmes, policies, laws              | Public health                                   | ICESCR                         | <ul style="list-style-type: none"> <li>• AAAQ</li> </ul>                                                                                                                                                                                                                                                                                                                                                                                                                                                                                                                                                            |
| 2015           | Sridhar D, McKee M, Ooms G, et al. Universal health coverage and the right to health: from legal principles to post-2015 indicators                                        | International Journal of Health Services | UHC                                   | Constructs new indicators or a new framework           | Both                                            | ICESCR General Comment 14      | <ul style="list-style-type: none"> <li>• Core minimum obligations as listed in General Comment 14, paragraph 43</li> <li>• Progressive realisation, i.e. if a state does not provide healthcare or a service, it must demonstrate that it used all available resources</li> <li>• Cost-effectiveness: states cannot prioritise expensive curative services which will be accessible only to a small portion of the population</li> <li>• International assistance and cooperation: economic and technical</li> <li>• Participatory decision-making</li> <li>• Needs of vulnerable or marginalised groups</li> </ul> |
| 2015           | Thomas R, Kuruvilla S, Hinton R, et al. Assessing the impact of a human rights-based approach across a spectrum of change for women's, children's, and adolescents' health | Health and Human Rights Journal          | Maternal and child health             | Defines or discusses principles of the right to health | Human rights                                    | Common Understanding           | <ul style="list-style-type: none"> <li>• AAAQ</li> <li>• Participation</li> <li>• Equality and non-discrimination</li> <li>• Accountability</li> </ul>                                                                                                                                                                                                                                                                                                                                                                                                                                                              |
| 2015           | Hunt P, Yamin AE, Bustreo F. Making the case: what is the evidence of impact of applying human rights-based approaches to health?                                          | Health and Human Rights Journal          | General                               | Defines or discusses principles of the right to health | Both                                            | None                           | None (editorial)                                                                                                                                                                                                                                                                                                                                                                                                                                                                                                                                                                                                    |

| Year published | Study                                                                                                                                          | Journal                         | Area of public health                             | Type of research                                       | Discipline public health, human rights, or both | International instruments used                                                  | Principles of the right to health                                                                                                                                                                                                                                                            |
|----------------|------------------------------------------------------------------------------------------------------------------------------------------------|---------------------------------|---------------------------------------------------|--------------------------------------------------------|-------------------------------------------------|---------------------------------------------------------------------------------|----------------------------------------------------------------------------------------------------------------------------------------------------------------------------------------------------------------------------------------------------------------------------------------------|
| 2015           | Yamin AE, Frisancho A. Human-rights-based approaches to health in Latin America                                                                | Lancet                          | General                                           | Reviews cases, programmes, policies, laws              | Public health                                   | None                                                                            | <ul style="list-style-type: none"> <li>• Underlying determinants of health</li> <li>• Participation</li> <li>• Accountability (social and legal)</li> <li>• Redress</li> <li>• Transparency</li> <li>• Equality and non-discrimination</li> <li>• Duty-bearers and rights-holders</li> </ul> |
| 2016           | Luh J, Cronk R, Bartram J. Assessing progress towards public health, human rights, and international development goals using frontier analysis | Plos ONE                        | General                                           | Uses current public health indicators                  | Public health                                   | None                                                                            | <ul style="list-style-type: none"> <li>• Progressive realisation</li> </ul>                                                                                                                                                                                                                  |
| 2016           | Perehudoff K, Toebes B, Hogerzeil H. A human rights-based approach to the reimbursement of expensive medicines                                 | Bulletin of the WHO             | Access to medicines                               | Defines or discusses principles of the right to health | Public health                                   | ICESCR<br>General Comment 3<br>Limburg Principles<br>TRIPS<br>Ruggie Principles | <ul style="list-style-type: none"> <li>• Progressive realisation</li> <li>• Maximum available resources</li> <li>• Transparency</li> <li>• Non-discrimination</li> <li>• Accountability</li> </ul>                                                                                           |
| 2016           | Perehudoff KS, Toebes B, Hogerzeil H. Essential medicines in national constitutions: progress since 2008                                       | Health and Human Rights Journal | Access to medicines and constitutional provisions | Constructs new indicators or a new framework           | Human rights                                    | WHO<br>Constitution<br>UDHR<br>ICESCR<br>General Comment 14                     | <ul style="list-style-type: none"> <li>• Responsibility to respect, protect, and fulfil</li> <li>• AAAQ of medicines-related rights</li> <li>• Core obligation: immediate action on the provision of medicines</li> </ul>                                                                    |

| Year published | Study                                                                                                                                                                                                     | Journal                    | Area of public health     | Type of research                                       | Discipline public health, human rights, or both | International instruments used                                                                                                                          | Principles of the right to health                                                                                                                                                                                                                                                                                                                                                                                                                                                                                                            |
|----------------|-----------------------------------------------------------------------------------------------------------------------------------------------------------------------------------------------------------|----------------------------|---------------------------|--------------------------------------------------------|-------------------------------------------------|---------------------------------------------------------------------------------------------------------------------------------------------------------|----------------------------------------------------------------------------------------------------------------------------------------------------------------------------------------------------------------------------------------------------------------------------------------------------------------------------------------------------------------------------------------------------------------------------------------------------------------------------------------------------------------------------------------------|
| 2017           | De Luca GB, Zopunyan V, Burke-Shyne N, Papikyan A, Amiryan D. Palliative care and human rights in patient care: An Armenia case study                                                                     | Public Health Reviews      | Palliative care           | Reviews cases, programmes, policies, laws              | Public health                                   | General Comment 14                                                                                                                                      | <ul style="list-style-type: none"> <li>• Right to information regarding prognoses, treatment options and side effects in an easily understandable way</li> <li>• Informed consent of patient before any intervention or treatment</li> <li>• Right to privacy and confidentiality</li> <li>• Training on palliative care for healthcare providers</li> <li>• Removal of legal barriers to prescribe opioids to patients with life-long conditions</li> </ul>                                                                                 |
| 2017           | Gruskin S, Ferguson L, Kumar S, Nicholson A, Ali M, Khosla R. A novel methodology for strengthening human rights based monitoring in public health: family planning indicators as an illustrative example | Plos ONE                   | Maternal and child health | Defines or discusses principles of the right to health | Public health                                   | General Comment 20<br>General Comment 14<br>UN Recommendation 24<br>CEDAW<br>ICESCR<br>UNDP report 2005<br>General Comment 15<br>CRC<br>HRC report 2012 | <ul style="list-style-type: none"> <li>• Non-discrimination</li> <li>• AAAQ</li> <li>• Informed decision-making: full, prior, free, and informed consent</li> <li>• Privacy and confidentiality</li> <li>• Participation</li> <li>• Accountability</li> </ul>                                                                                                                                                                                                                                                                                |
| 2018           | Jain AK, Hardee K. Revising the Family Planning Quality of Care Framework in the context of rights-based family planning                                                                                  | Studies in Family Planning | Maternal and child health | Defines or discusses principles of the right to health | Public health                                   | General Comment 14<br>General Comment 22                                                                                                                | <ul style="list-style-type: none"> <li>• Availability</li> <li>• Accessibility (physical, economic, information)</li> <li>• Acceptability</li> <li>• Quality: evidence-based practices that are scientifically and medically appropriate</li> <li>• Information exchange: two-way communication between service providers and clients where clients have the right to seek information</li> <li>• Right of the client to switch method of contraception or provider</li> <li>• Dignity, respect to the person and confidentiality</li> </ul> |

| Year published | Study                                                                                                                                          | Journal              | Area of public health | Type of research                                       | Discipline public health, human rights, or both | International instruments used                                                                                                                                                               | Principles of the right to health                                                                                                                                                                                                                                                                                                                                                                                                                                                                                                                  |
|----------------|------------------------------------------------------------------------------------------------------------------------------------------------|----------------------|-----------------------|--------------------------------------------------------|-------------------------------------------------|----------------------------------------------------------------------------------------------------------------------------------------------------------------------------------------------|----------------------------------------------------------------------------------------------------------------------------------------------------------------------------------------------------------------------------------------------------------------------------------------------------------------------------------------------------------------------------------------------------------------------------------------------------------------------------------------------------------------------------------------------------|
| 2018           | Perehudoff SK, Alexandrov NV, Hogerzeil HV. Access to essential medicines in 195 countries: a human rights approach to sustainable development | Global Public Health | Access to medicines   | Constructs new indicators or a new framework           | Public health                                   | Same as Backman et al (2008)                                                                                                                                                                 | <ul style="list-style-type: none"> <li>• Legal obligation to fulfil the right to health</li> <li>• Use of maximum available resources</li> <li>• Minimum core obligation to provide essential medicines</li> <li>• Non-discrimination</li> <li>• Progressive realisation: to expand access to health services, incl. essential medicines, using maximum available resources</li> <li>• AAAQ</li> <li>• Adoption of a national plan</li> <li>• Transparency</li> <li>• Participation</li> <li>• Monitoring and accountability mechanisms</li> </ul> |
| 2018           | Patterson D, Buse K, Magnusson R, Toebes B. Identifying a human rights-based approach to obesity for states and civil society                  | Obesity Reviews      | Obesity               | Defines or discusses principles of the right to health | Public health                                   | 2018 Political Declaration of the 3rd High Level Meeting on NCDs<br>WHO Constitution<br>ICESCR<br>UDHR<br>Global Action Plan for the Prevention and Control of NCDs 2013-2020<br>FCTC<br>CRC | <ul style="list-style-type: none"> <li>• Accountability of duty-bearers</li> <li>• Rights-holders</li> <li>• Participation</li> <li>• States obligations to respect, protect, and fulfil</li> <li>• Use of UN accountability mechanisms</li> </ul>                                                                                                                                                                                                                                                                                                 |

| Year published | Study                                                                                                 | Journal                         | Area of public health | Type of research                                       | Discipline public health, human rights, or both | International instruments used                                                                                                                                             | Principles of the right to health                                                                                                                                                                                                                                                                                                                   |
|----------------|-------------------------------------------------------------------------------------------------------|---------------------------------|-----------------------|--------------------------------------------------------|-------------------------------------------------|----------------------------------------------------------------------------------------------------------------------------------------------------------------------------|-----------------------------------------------------------------------------------------------------------------------------------------------------------------------------------------------------------------------------------------------------------------------------------------------------------------------------------------------------|
| 2019           | Bueno De Mesquita J. The universal periodic review: a valuable new procedure for the right to health? | Health and Human Rights Journal | General               | Defines or discusses principles of the right to health | Human rights                                    | WHO Constitution<br>UDHR<br>ICESCR<br>CRC<br>CEDAW<br>General Comments<br>Special Rapporteur's reports<br>Regional human rights treaties<br>National Constitutions<br>SDGs | <ul style="list-style-type: none"> <li>• Social determinants of health</li> </ul>                                                                                                                                                                                                                                                                   |
| 2019           | Burkholder TW, Hill K, Hynes EJC. Developing emergency care systems: a human rights-based approach    | Bulletin of the WHO             | Emergency care        | Defines or discusses principles of the right to health | Public health                                   | WHO Constitution<br>UDHR<br>ICESCR<br>CRC<br>General Comment 14<br>National Constitutions<br>Alma-Ata Declaration<br>Ouagadougou Declaration<br>SDGs                       | <ul style="list-style-type: none"> <li>• AAAQ applied to emergency care</li> <li>• 6 core obligations integrated into the WHO building blocks: access, essential medicines, equitable distribution, national public health strategy.</li> <li>• Respect, promote, and protect right to emergency care</li> <li>• Progressive realisation</li> </ul> |



| Year published | Study                                                                                                                                                                                | Journal                                    | Area of public health | Type of research                                       | Discipline public health, human rights, or both | International instruments used                                                                                                          | Principles of the right to health                                                                                                                                                                                                                                                                                      |
|----------------|--------------------------------------------------------------------------------------------------------------------------------------------------------------------------------------|--------------------------------------------|-----------------------|--------------------------------------------------------|-------------------------------------------------|-----------------------------------------------------------------------------------------------------------------------------------------|------------------------------------------------------------------------------------------------------------------------------------------------------------------------------------------------------------------------------------------------------------------------------------------------------------------------|
| 2019           | Da Mota Almeida Peroni F, Lindelow M, Oliveira De Souza D, Sjoblom M. Realizing the right to health in Brazil's Unified Health System through the lens of breast and cervical cancer | International Journal for Equity in Health | Cancer                | Uses current public health indicators                  | Public health                                   | WHO Constitution<br>OECD's framework for elements of good cancer care                                                                   | <ul style="list-style-type: none"> <li>• Quality of services</li> </ul>                                                                                                                                                                                                                                                |
| 2019           | Gianella C, Pesantes MA, Ugarte-Gil C, et al. Vulnerable populations and the right to health: lessons from the Peruvian Amazon around tuberculosis control                           | International Journal for Equity in Health | TB                    | Reviews cases, programmes, policies, laws              | Public health                                   | 1993 Peruvian Constitution                                                                                                              | <ul style="list-style-type: none"> <li>• Acceptability</li> <li>• Availability</li> <li>• Affordability</li> <li>• Adaptability</li> <li>• Quality</li> </ul>                                                                                                                                                          |
| 2019           | Nygren-Krug H. The right(s) road to universal health coverage                                                                                                                        | Health and Human Rights Journal            | UHC                   | Defines or discusses principles of the right to health | Human rights                                    | UDHR<br>WHO Constitution<br>Alma-Ata Declaration<br>Astana Declaration<br>General Comment 14<br>General Comment 24<br>Ruggie Principles | <ul style="list-style-type: none"> <li>• International assistance</li> <li>• Core minimum obligations, incl. non-retrogression</li> <li>• Maximum available resources</li> <li>• Equality and non-discrimination</li> <li>• Transparency</li> <li>• Participation</li> <li>• Accountability</li> <li>• AAAQ</li> </ul> |

| Year published | Study                                                                                                                                                                  | Journal                 | Area of public health | Type of research                             | Discipline public health, human rights, or both | International instruments used                                                             | Principles of the right to health                                                                                                                                                                                                                                                                                                                    |
|----------------|------------------------------------------------------------------------------------------------------------------------------------------------------------------------|-------------------------|-----------------------|----------------------------------------------|-------------------------------------------------|--------------------------------------------------------------------------------------------|------------------------------------------------------------------------------------------------------------------------------------------------------------------------------------------------------------------------------------------------------------------------------------------------------------------------------------------------------|
| 2019           | Rehfuess EA, Stratil JM, Scheel IB, et al. The WHO-INTEGRATE evidence to decision framework version 1.0: integrating WHO norms and values and a complexity perspective | BMJ Global Health       | General               | Constructs new indicators or a new framework | Public health                                   | WHO Constitution                                                                           | <ul style="list-style-type: none"> <li>• AAAQ</li> <li>• Equality and non-discrimination</li> <li>• Accountability</li> <li>• Participation</li> <li>• Transparency (mentioned under “equity” pillar and not human rights)</li> <li>• Social determinants of health (mentioned under “societal implications” pillar and not human rights)</li> </ul> |
| 2019           | Stangl AL, Singh D, Windle M, et al. A systematic review of selected human rights programs to improve HIV-related outcomes from 2003 to 2015: what do we know?         | BMC Infectious Diseases | HIV                   | Reviews cases, programmes, policies, laws    | Public health                                   | None                                                                                       | <ul style="list-style-type: none"> <li>• AAAQ</li> <li>• Rights-holders and duty-bearers (although not understood as states)</li> <li>• Non-discrimination</li> <li>• Participation</li> <li>• Empowerment</li> <li>• Accountability</li> <li>• Interrelatedness of human rights</li> </ul>                                                          |
| 2019           | Tuomisto K, Tiittala P, Keskimäki I, Helve O. Refugee crisis in Finland: challenges to safeguarding the right to health for asylum seekers                             | Health Policy           | UHC                   | Reviews cases, programmes, policies, laws    | Public health                                   | General Comment 14<br>UDHR<br>ICESCR<br>CRC<br>Finnish Constitution<br>Other national laws | None                                                                                                                                                                                                                                                                                                                                                 |

| Year published | Study                                                                                                                                                                                | Journal                                    | Area of public health | Type of research                          | Discipline public health, human rights, or both | International instruments used | Principles of the right to health                                                                                                                                                                                                                                                                                                                                                                                               |
|----------------|--------------------------------------------------------------------------------------------------------------------------------------------------------------------------------------|--------------------------------------------|-----------------------|-------------------------------------------|-------------------------------------------------|--------------------------------|---------------------------------------------------------------------------------------------------------------------------------------------------------------------------------------------------------------------------------------------------------------------------------------------------------------------------------------------------------------------------------------------------------------------------------|
| 2019           | Cros M, Cavagnero E, Alfred JP, et al. Equitable realization of the right to health in Haiti: how household data inform health seeking behavior and financial risk protection        | International Journal for Equity in Health | UHC                   | Uses current public health indicators     | Public health                                   | SDGs                           | <ul style="list-style-type: none"> <li>• Accessibility (financial)</li> </ul>                                                                                                                                                                                                                                                                                                                                                   |
| 2019           | Perehudoff SK, Alexandrov NV, Hogerzeil HV. The right to health as the basis for universal health coverage: a cross-national analysis of national medicines policies of 71 countries | Plos ONE                                   | Access to medicines   | Reviews cases, programmes, policies, laws | Public health                                   | ICESCR General Comment 14      | <ul style="list-style-type: none"> <li>• Core obligations</li> <li>• Progressive realisation</li> <li>• Maximum available resources</li> <li>• Legal mandate</li> <li>• Participation</li> <li>• Transparency</li> <li>• Monitoring</li> <li>• Non-discrimination</li> <li>• International assistance and cooperation</li> <li>• Cost-effectiveness</li> <li>• Duty-bearer</li> <li>• Accountability</li> <li>• AAAQ</li> </ul> |

| Year published | Study                                                                                                                                                                                | Journal                    | Area of public health | Type of research                             | Discipline public health, human rights, or both | International instruments used | Principles of the right to health                                                                                                                                                                                                                                                                                                                                                                                               |
|----------------|--------------------------------------------------------------------------------------------------------------------------------------------------------------------------------------|----------------------------|-----------------------|----------------------------------------------|-------------------------------------------------|--------------------------------|---------------------------------------------------------------------------------------------------------------------------------------------------------------------------------------------------------------------------------------------------------------------------------------------------------------------------------------------------------------------------------------------------------------------------------|
| 2019           | Perehudoff SK, Alexandrov NV, Hogerzeil HV. Legislating for universal access to medicines: a rights-based cross-national comparison of UHC laws in 16 countries                      | Health Policy and Planning | Access to medicines   | Reviews cases, programmes, policies, laws    | Public health                                   | ICESCR General Comment 14      | <ul style="list-style-type: none"> <li>• Core obligations</li> <li>• Progressive realisation</li> <li>• Maximum available resources</li> <li>• Legal mandate</li> <li>• Participation</li> <li>• Transparency</li> <li>• Monitoring</li> <li>• Non-discrimination</li> <li>• International assistance and cooperation</li> <li>• Cost-effectiveness</li> <li>• Duty bearer</li> <li>• Accountability</li> <li>• AAAQ</li> </ul> |
| 2020           | Kantamaturapoj K, Kulthanmanusorn A, Witthayapipopsakul W, et al. Legislating for public accountability in universal health coverage                                                 | Bulletin of the WHO        | UHC                   | Reviews cases, programmes, policies, laws    | Public health                                   | None                           | <ul style="list-style-type: none"> <li>• Participation</li> <li>• Accountability</li> <li>• Legal mandate</li> </ul>                                                                                                                                                                                                                                                                                                            |
| 2020           | Perehudoff K. Universal access to essential medicines as part of the right to health: a cross-national comparison of national laws, medicines policies, and health system indicators | Global Health Action       | Access to medicines   | Constructs new indicators or a new framework | Public health                                   | ICESCR General Comment 14      | <ul style="list-style-type: none"> <li>• Progressive realisation</li> <li>• Cost-effectiveness</li> <li>• Core obligations</li> <li>• Transparency</li> <li>• Participation</li> <li>• Duty-bearer</li> <li>• Legal mandate</li> <li>• Accountability and redress</li> <li>• Monitoring and evaluation</li> <li>• International assistance and cooperation</li> <li>• Non-discrimination</li> </ul>                             |

## Full title of instruments

| Short title          | Full title                                                                                                                                                                                     |
|----------------------|------------------------------------------------------------------------------------------------------------------------------------------------------------------------------------------------|
| Alma-Ata Declaration | Declaration of Alma Ata on Primary Health Care (1978)                                                                                                                                          |
| Astana Declaration   | Astana Declaration on Primary Health Care (2018)                                                                                                                                               |
| Bangkok Charter      | The Bangkok Charter for Health Promotion in a Globalized World (2008)                                                                                                                          |
| CAT                  | Convention against Torture and Other Cruel, Inhuman or Degrading Treatment or Punishment (1984)                                                                                                |
| CEDAW                | Convention on the Elimination of all forms of Discrimination Against Women (1979)                                                                                                              |
| CERD                 | Convention on the Elimination of Racial Discrimination (1965)                                                                                                                                  |
| Common Understanding | UN Common Understanding on a Human Rights-Based Approach to Development Cooperation (2003)                                                                                                     |
| CRC                  | Convention on the Rights of the Child (1989)                                                                                                                                                   |
| CRMW                 | Convention on the Rights of Migrant Workers (1990)                                                                                                                                             |
| CRPD                 | Convention on the Rights of Persons with Disabilities (2006)                                                                                                                                   |
| FCTC                 | Framework Convention on Tobacco Control (2003)                                                                                                                                                 |
| General Comment 1    | General Comment No. 1: Reporting by States Parties (1981)                                                                                                                                      |
| General Comment 14   | General Comment No. 14: The Right to the Highest Attainable Standard of Health (Art. 12 of the Covenant) (2000)                                                                                |
| General Comment 15   | General Comment No. 15: The Right to Water (Arts. 11 and 12 of the Covenant) (2003)                                                                                                            |
| General Comment 20   | General Comment No. 20: Non-discrimination in economic, social and cultural rights (art. 2, para. 2 of the International Covenant on Economic, Social and Cultural Rights) (2009)              |
| General Comment 22   | General Comment No. 22 on the Right to sexual and reproductive health (article 12 of the International Covenant on Economic, Social and Cultural Rights) (2016)                                |
| General Comment 24   | General Comment No. 24 on State obligations under the International Covenant on Economic, Social and Cultural Rights in the context of business activities (2017)                              |
| General Comment 3    | General Comment No. 3: The Nature of States Parties' Obligations (Art. 2, Para. 1 of the Covenant) (1990)                                                                                      |
| General Comment 4    | General Comment No. 4: The Right to Adequate Housing (Art. 11 (1) of the Covenant) (1991)                                                                                                      |
| HRC report 2012      | Report of the Human Rights Council (2012)                                                                                                                                                      |
| ICCPR                | International Covenant on Civil and Political Rights (1966)                                                                                                                                    |
| ICESCR               | International Covenant on Economic, Social and Cultural Rights (1966)                                                                                                                          |
| IHR                  | International Health Regulations (2005)                                                                                                                                                        |
| Limburg Principles   | Note verbale dated 5 December 1986 from the Permanent Mission of the Netherlands to the United Nations Office at Geneva addressed to the Centre for Human Rights ("Limburg Principles") (1987) |

| Short title                  | Full title                                                                                            |
|------------------------------|-------------------------------------------------------------------------------------------------------|
| Ottawa Charter               | Ottawa Charter for Health Promotion (1987)                                                            |
| Ouagadougou Declaration      | Ouagadougou Declaration on Primary Health Care and Health Systems in Africa (2008)                    |
| Ruggie Principles            | United Nations Guiding Principles on Business and Human Rights (2011)                                 |
| SDGs                         | Sustainable Development Goals: the 2030 Agenda for Sustainable Development (2015)                     |
| Special Rapporteur's reports | Reports of the UN Special Rapporteur on the Highest Attainable Standard of Physical and Mental Health |
| TRIPS                        | Agreement on Trade-Related Aspects of Intellectual Property Rights (1994)                             |
| UDHR                         | Universal Declaration of Human Rights (1948)                                                          |
| UN Charter                   | Charter of the United Nations (1945)                                                                  |
| UN Recommendation 24         | CEDAW General Recommendation No. 24: Article 12 of the Convention (Women and Health) (1999)           |
| UNDP report 2005             | Human Development Report (2005)                                                                       |
| WHO Constitution             | Constitution of the World Health Organisation (1946)                                                  |
